# Supplementary material
Source: Elsevier journal article supplement (https://www.sciencedirect.com/science/article/pii/S0212656715003339)
Supplement: mmc1 [file S0212656715003339:mmc1.pdf]

Lactancia materna, alimentación complementaria y estado nutricional en niños preescolares

Fecha:    Día     Mes     Año

Nombre del niño: \_\_\_\_\_

Afiliación:

|   |                                                               |                             |                                    |                                                                    |
|---|---------------------------------------------------------------|-----------------------------|------------------------------------|--------------------------------------------------------------------|
|   |                                                               |                             | No escriba en la columna sombreada |                                                                    |
| 1 | Sexo                                                          | 1. Masculino    2. Femenino | 1                                  | <div><div></div></div>                                             |
| 2 | Edad del niño en meses (Anote las unidades que da la madre)   | _____                       | 2                                  | <div><div></div><div></div></div> Meses                            |
| 3 | Edad de la madre (años)                                       | _____                       | 3                                  | <div><div></div><div></div></div>                                  |
| 4 | Número de hijos:                                              | _____                       | 4                                  | <div><div></div><div></div></div>                                  |
| 5 | ¿Qué lugar ocupa el hijo <i>motivo de este cuestionario</i> ? | _____                       | 5                                  | <div><div></div><div></div></div>                                  |
| 6 | Peso en Kilogramos:                                           | _____                       | 6                                  | <div><div></div><div></div><div></div><div></div><div></div></div> |
| 7 | Talla en Centímetros:                                         | _____                       | 7                                  | <div><div></div><div></div><div></div><div></div><div></div></div> |
| 8 | Indice de Masa corporal                                       | _____                       | 8                                  | <div><div></div><div></div><div></div><div></div><div></div></div> |

Lactancia y Alimentación complementaria

Anote en cada pregunta la informacion que se solicita

Escriba claramente o tache la opcion que corresponda

Señale con una X el mes en que se le proporciono lactancia, el alimento y su duracion

|      |                                               |       |   |   |   |   |   |   |   |   |    |    |    |    |    |    |    |    |                                   |
|------|-----------------------------------------------|-------|---|---|---|---|---|---|---|---|----|----|----|----|----|----|----|----|-----------------------------------|
|      |                                               | 1     | 2 | 3 | 4 | 5 | 6 | 7 | 8 | 9 | 10 | 11 | 12 | 13 | 14 | 15 | 16 | 17 | 18                                |
| 9    | Lactancia Materna Exclusiva                   |       |   |   |   |   |   |   |   |   |    |    |    |    |    |    |    |    |                                   |
| 10   | Leche de Formula                              |       |   |   |   |   |   |   |   |   |    |    |    |    |    |    |    |    |                                   |
| 10.1 | De inicio:                                    |       |   |   |   |   |   |   |   |   |    |    |    |    |    |    |    |    |                                   |
| 10.2 | De continuacion:                              |       |   |   |   |   |   |   |   |   |    |    |    |    |    |    |    |    |                                   |
| 11   | Tés                                           |       |   |   |   |   |   |   |   |   |    |    |    |    |    |    |    |    |                                   |
| 12   | Agua                                          |       |   |   |   |   |   |   |   |   |    |    |    |    |    |    |    |    |                                   |
| 13   | Papilla                                       |       |   |   |   |   |   |   |   |   |    |    |    |    |    |    |    |    |                                   |
|      | Fruta                                         |       |   |   |   |   |   |   |   |   |    |    |    |    |    |    |    |    |                                   |
|      | Verdura                                       |       |   |   |   |   |   |   |   |   |    |    |    |    |    |    |    |    |                                   |
|      | Cereales                                      |       |   |   |   |   |   |   |   |   |    |    |    |    |    |    |    |    |                                   |
|      | Carnes                                        |       |   |   |   |   |   |   |   |   |    |    |    |    |    |    |    |    |                                   |
|      | Leguminosas                                   |       |   |   |   |   |   |   |   |   |    |    |    |    |    |    |    |    |                                   |
|      | Lacteos                                       |       |   |   |   |   |   |   |   |   |    |    |    |    |    |    |    |    |                                   |
|      | Pescado                                       |       |   |   |   |   |   |   |   |   |    |    |    |    |    |    |    |    |                                   |
|      | Mariscos                                      |       |   |   |   |   |   |   |   |   |    |    |    |    |    |    |    |    |                                   |
| 14   | Alimento utilizado para iniciar la Ablatacion | _____ |   |   |   |   |   |   |   |   |    |    |    |    |    |    |    | 14 | <div><div></div><div></div></div> |
